# Supplementary material for: Usefulness of serum D-dimer and platelet count to mean platelet volume ratio to rule out chronic periprosthetic joint infection
Source: Copernicus journal article supplement (doi:10.5194/jbji-7-109-2022), 2022-05-17
Supplement: Supplementary file 1 [file jbji-7-109-2022-supplement.zip]

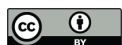

## *Supplement of*

# **Usefulness of serum D-dimer and platelet count to mean platelet volume ratio to rule out chronic periprosthetic joint infection**

**Ernesto Muñoz-Mahamud et al.**

*Correspondence to:* Ernesto Muñoz-Mahamud (e.munoz.mahamud@gmail.com)

- [jbji-7-109-2022-supplement-title-page.pdf](#)
- [Data D-Dimer.sav](#)
- [Data D-Dimer.xlsx](#)

The copyright of individual parts of the supplement might differ from the article licence.
